# Supplementary material for: Multifunctional Interleukin-24 Resolves Neuroretina Autoimmunity via Diverse Mechanisms
Source: MDPI journal article supplement (doi:10.3390/ijms231911988), 2022-10-09
Supplement: s1 [file s1]

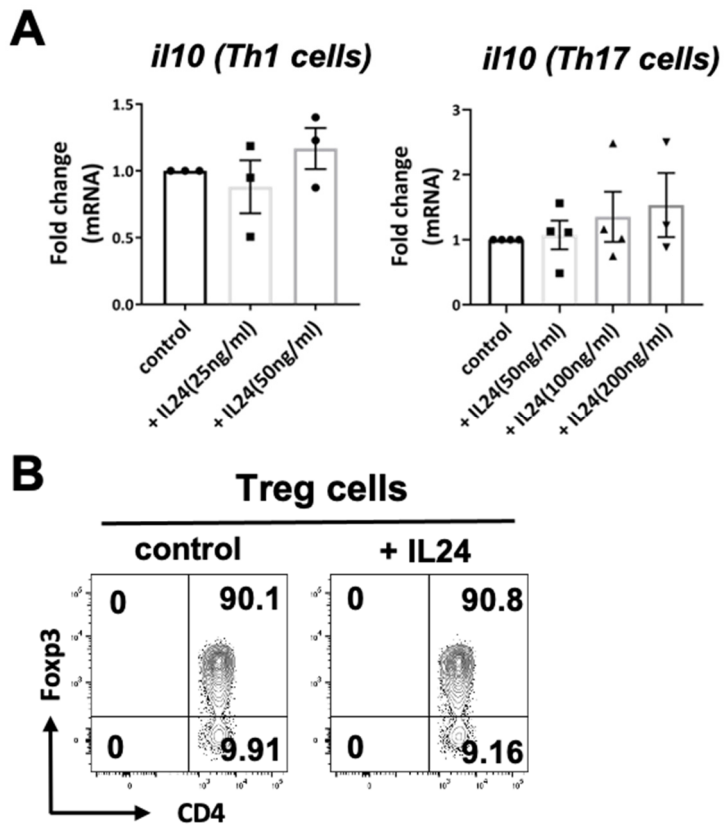

**Figure S1.** IL-24 did not affect IL-10 expression or Treg differentiation. CD4<sup>+</sup>CD62L<sup>+</sup> T cells from spleens and LNs of C57BL/6 mice were isolated and polarized under Th1, Th17, or Treg conditions, with anti-CD3/CD28 antibodies for (A) 3 or (B) 4 days with and without recombinant IL-24. (A) Relative gene expression of IL-10 in Th1 and Th17 cells. Data represent means  $\pm$  SEMs of (A) three or (B) four independent experiments. One-way ANOVA. (B) Representative flow cytometry Foxp3 expression in Treg cells.

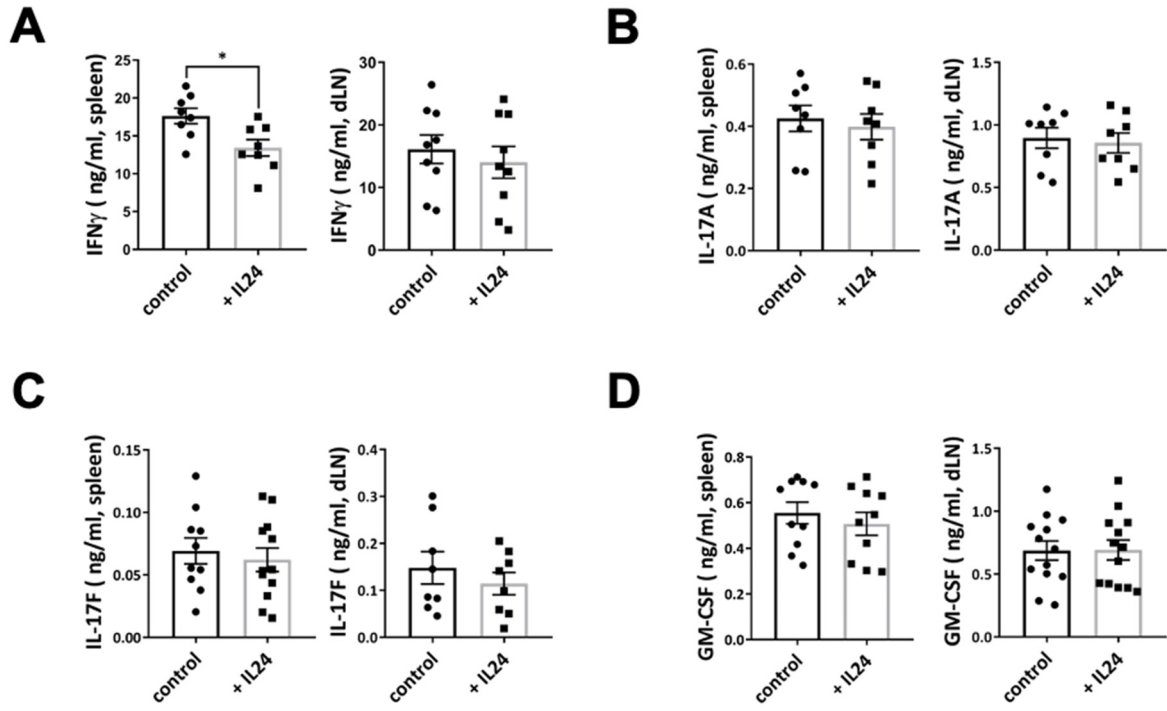

**Figure S2. IL-24 inhibits antigen-specific Th1 and Th17 responses.** (A-D) IRBP-specific IFN- $\gamma$ , IL-17A, IL-17F, and GM-CSF production in the spleens and dLNs of EAU mice. Cells were isolated from spleens or dLNs of the EAU mice 21-24 days after immunization and were stimulated with 10 mg/mL IRBP<sub>1-20</sub> with and without recombinant IL-24. After 48 h, culture supernatants were collected and the cytokine production was determined with ELISA. Data represent means  $\pm$  SEMs of three independent experiments. \*  $p < 0.05$ , Student's  $t$  test.
